# Supplementary material for: Designing lead-free bismuth ferrite-based ceramics learning from relaxor ferroelectric behavior for simultaneous high energy density and efficiency under low electric field
Source: Royal Society of Chemistry journal article supplement (doi:10.1039/c8tc03855d), 2018-01-01
Supplement: c8tc03855d1.pdf [file c8tc03855d1.pdf]

## *Supporting Information*

### ***Designing lead-free bismuth ferrite-based ceramics learning from relaxor ferroelectric behavior for simultaneous high energy density and efficiency under low electric field***

Ningtao Liu <sup>a,b,c</sup>, Ruihong Liang <sup>a,\*</sup>, Zhiyong Zhou <sup>a</sup>, Xianlin Dong <sup>a,c,\*</sup>

<sup>a</sup> Key Laboratory of Inorganic Functional Materials and Devices, Shanghai Institute of Ceramics, Chinese Academy of Sciences, Shanghai 200050, China

<sup>b</sup> University of Chinese Academy of Sciences, Beijing 100049, China

<sup>c</sup> The State Key Lab of High Performance Ceramics and Superfine Microstructure Shanghai Institute of Ceramics, Chinese Academy of Sciences, Shanghai 200050, China

Corresponding author E-mail: [liangruihong@mail.sic.ac.cn](mailto:liangruihong@mail.sic.ac.cn)

Corresponding author E-mail: [xldong@mail.sic.ac.cn](mailto:xldong@mail.sic.ac.cn)

**Keywords:** *Lead-free ceramics, Bismuth ferrite-based, Energy-storage, Pinched hysteresis loop, Relaxor ferroelectrics*

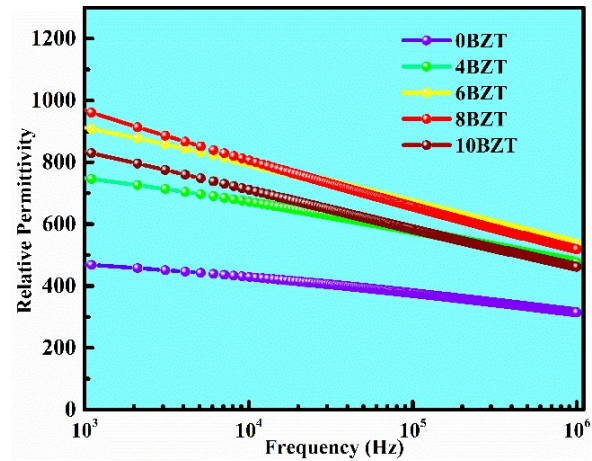

Figure S1. Frequency-dependent dielectric properties for the BZT-modified BFO-based bulk ceramics

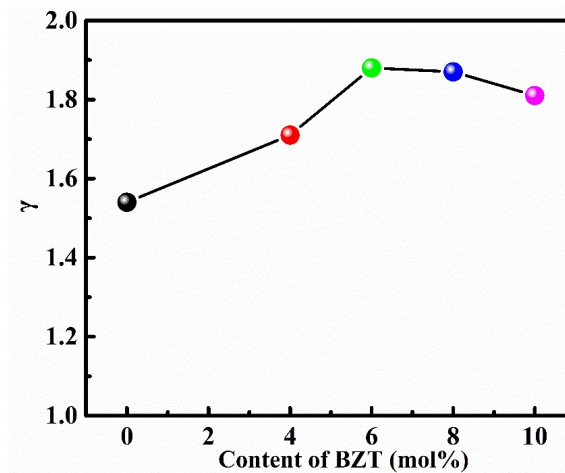

Figure S2. The diffuseness  $\gamma$  as a function of the BZT content

Herein the diffuseness  $\gamma$  is calculated from the  $\epsilon$ -T pattern (1MHz). Based on the following equation:  $1/\epsilon - 1/\epsilon_{\max} = (T - T_c)^\gamma / C$  ( $T > T_c$ ), where  $\gamma$  ( $1 \leq \gamma \leq 2$ ) and C are constant. The degree of relaxor behavior can be evaluated by the parameter  $\gamma$ , when  $\gamma = 1$  represents a normal ferroelectric material, and  $\gamma = 2$  represents a complete relaxor ferroelectric material.<sup>1</sup>

## References:

- (1) Shvartsman, V. V.; Lupascu, D. C.; Green, D. J., Lead-Free Relaxor Ferroelectrics. *Journal of the American Ceramic Society* **2012**, *95* (1), 1-26.
